# Supplementary material
Source: PubMed Central journal article supplement (PMC2787812)

Type of file: figure

Label: 2

Filename: figure\_2.doc

Supplementary Figure 1

A: Favorable

BAA

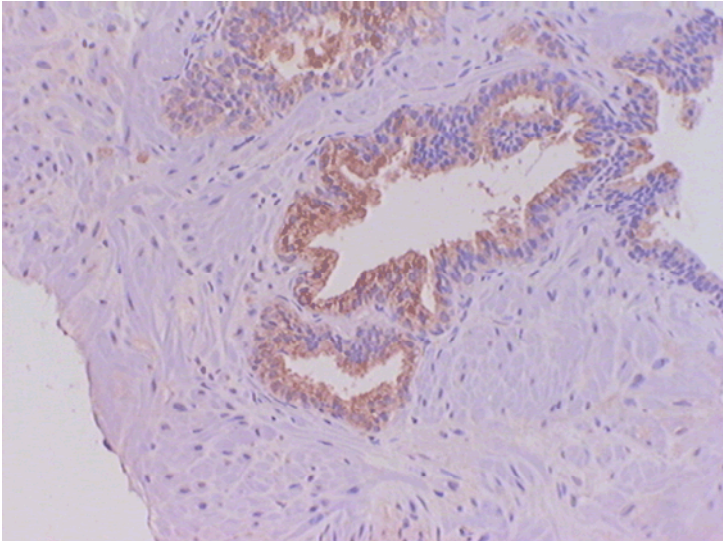

Cancer

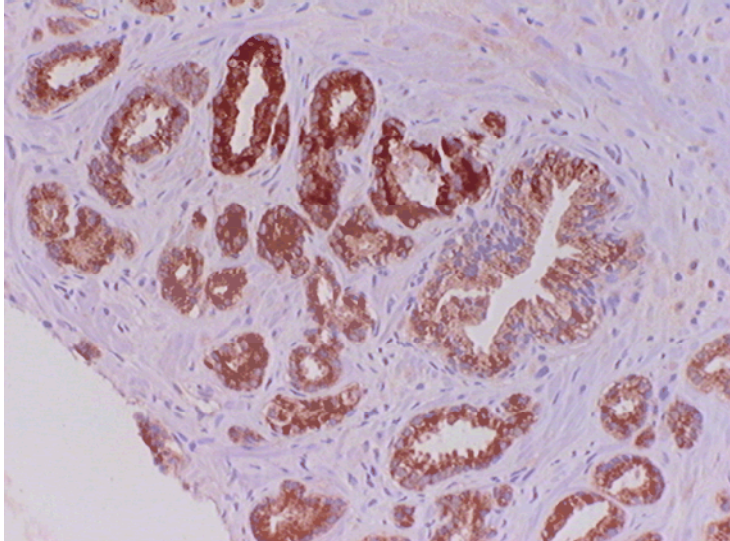

---

B: Unfavorable

BAA

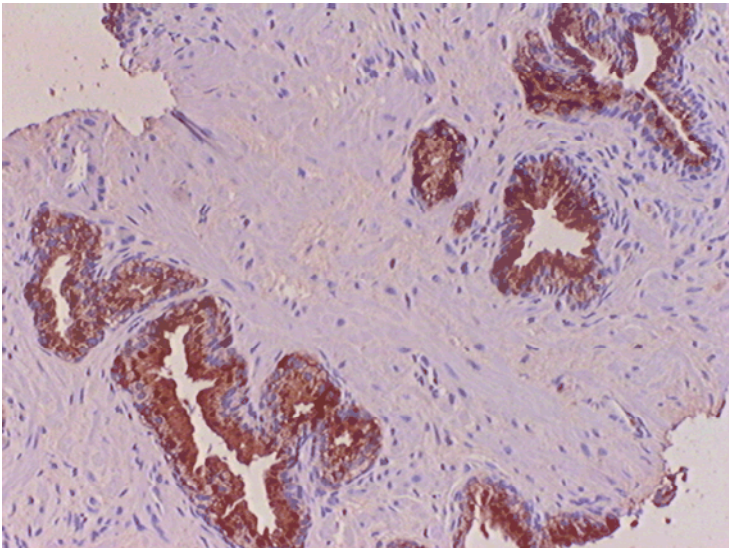

Cancer

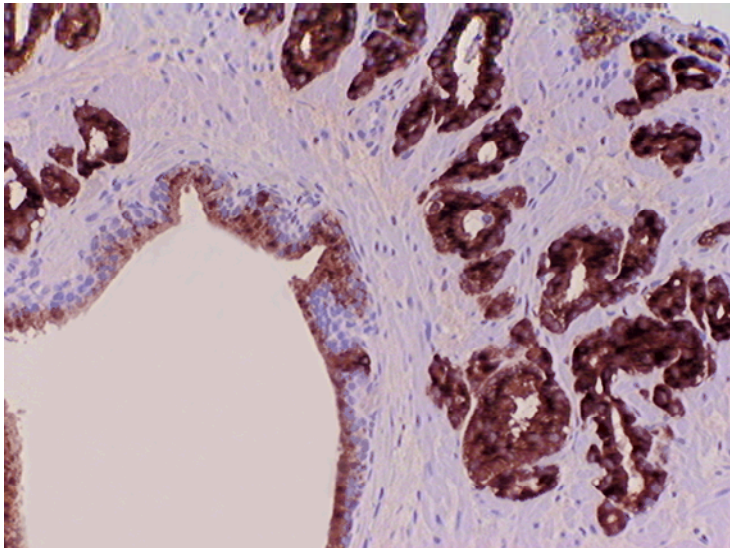

Supplement: NIHMS146482-supplement-supplement_1.pdf [file NIHMS146482-supplement-supplement_1.pdf]
